# Supplementary material for: A seven-coordinated DyIII single-ion magnet with C2v symmetry constructed by a multidentate Schiff-base ligand
Source: Royal Society of Chemistry journal article supplement (doi:10.1039/d0ce01826k), 2021-01-01
Supplement: d0ce01826k1.pdf [file d0ce01826k1.pdf]

## A seven-coordinated Dy<sup>III</sup> single ion magnet with C<sub>2v</sub> symmetry constructed by multidentate Schiff-base ligand

Ruirui Wang, Binling Yao, Feifei Bai, Wen Wang, Licun Li, Yue Ma,\* Qinglun Wang, Bin Zhao, Yuanzhu Zhang\*

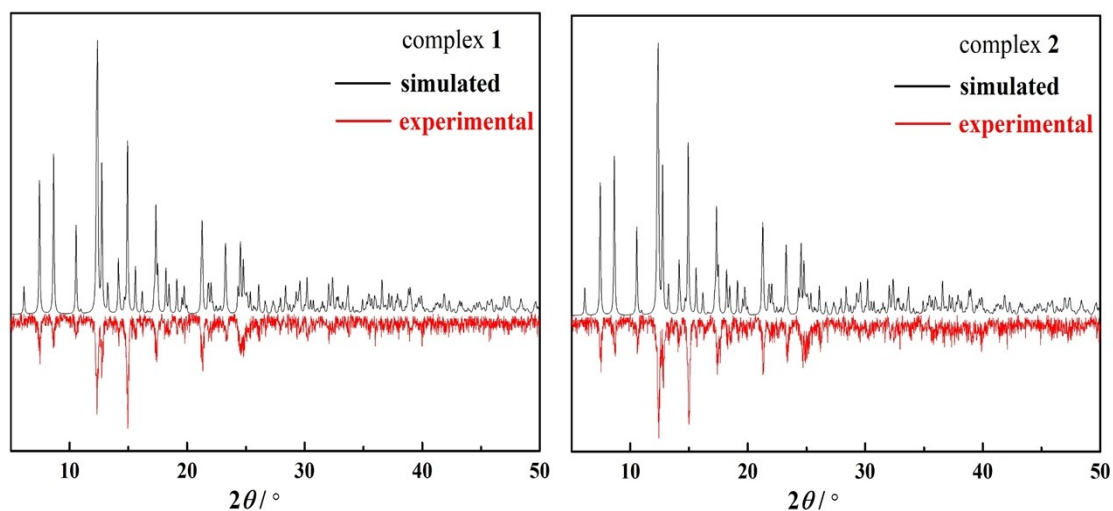

Fig S1 The PXRD pattern of complexes 1 and 2

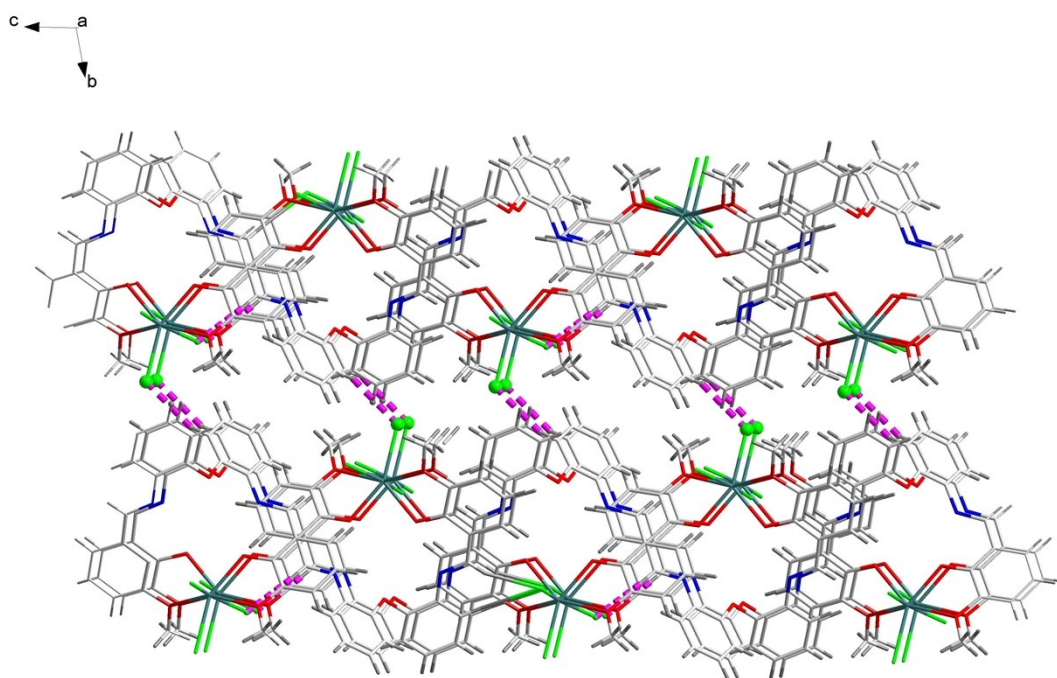

Fig S2 The 3D packing structure of complex 1

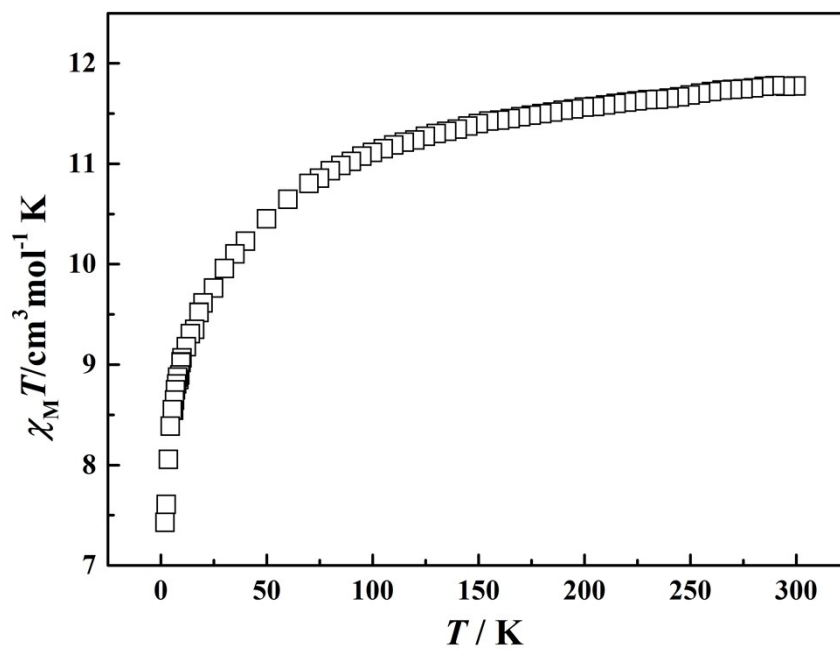

Fig S3 The temperature-dependence of the  $\chi_M T$  for complex 2

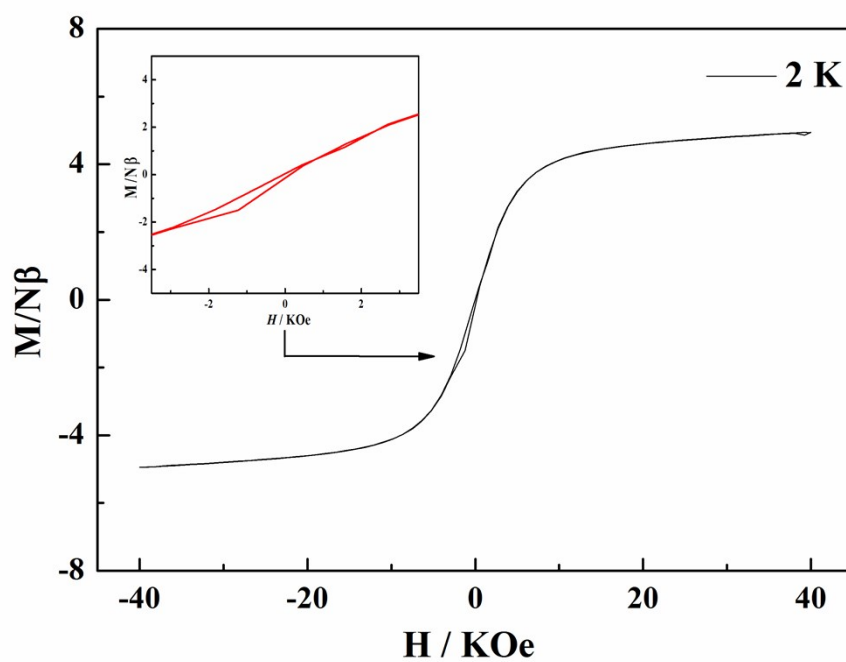

Fig S4 Magnetization curve versus applied field measured at 2 K for complex 1.

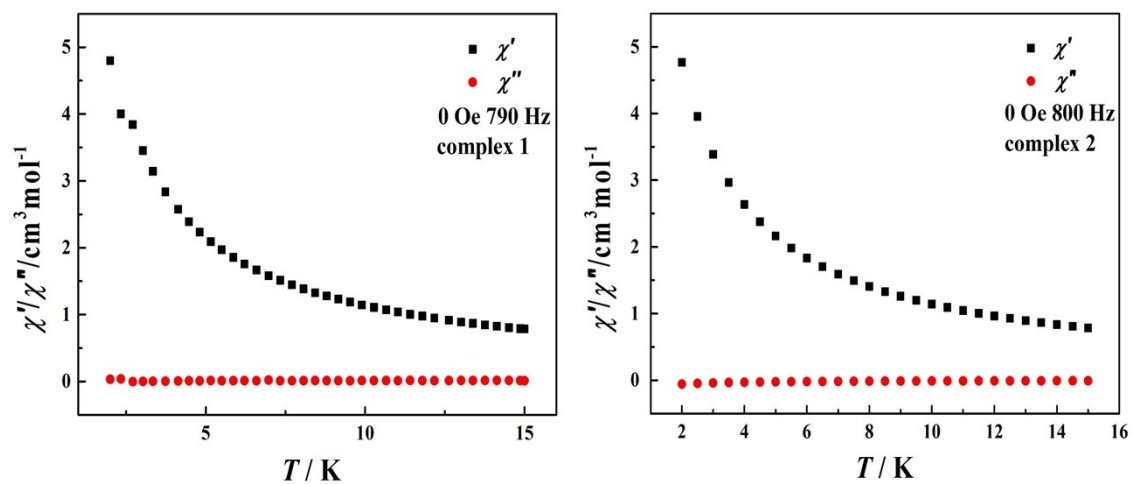

**Fig S5** Temperature dependence of the  $\chi'$  and  $\chi''$  ac magnetic susceptibility for **1** and **2** under zero dc field.

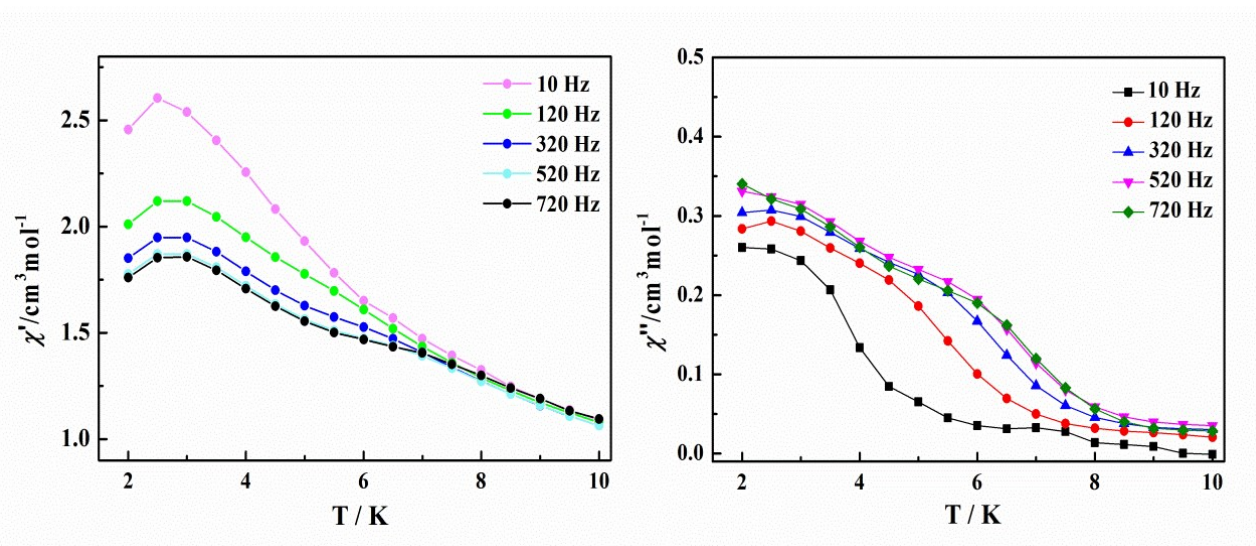

**Fig S6** Temperature dependence of the  $\chi'$  and  $\chi''$  ac magnetic susceptibility for **1** under 1500 Oe dc field.

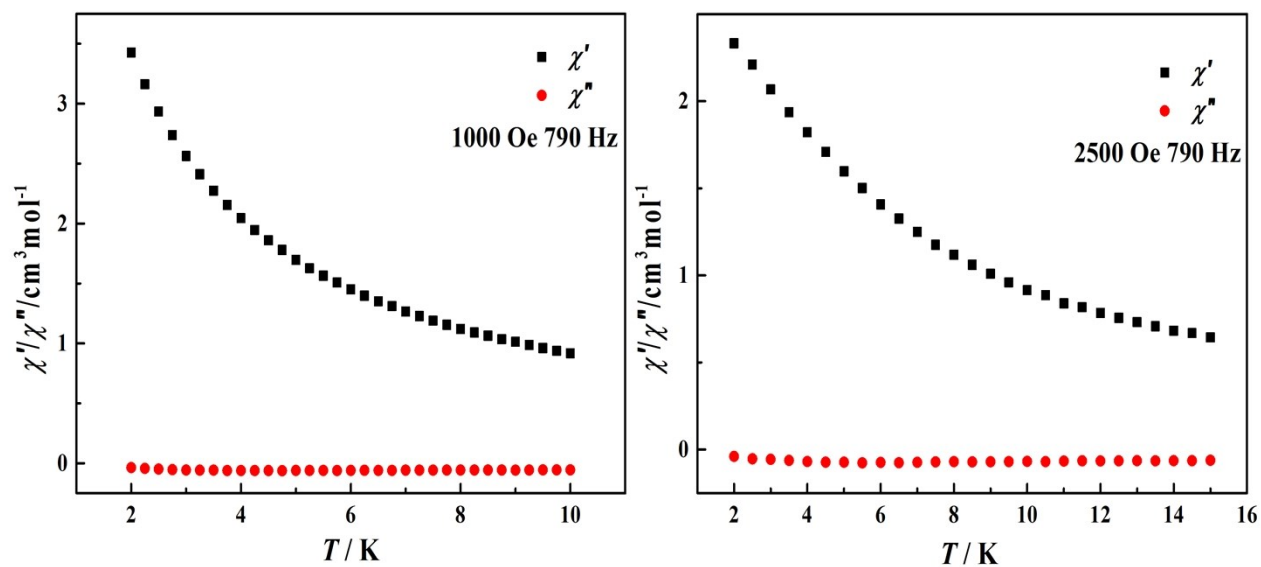

**Fig S7** Temperature dependence of the  $\chi'$  and  $\chi''$  ac magnetic susceptibility for **2** under 1000 Oe and 2500 Oe dc field.

**Table S1** Selected bond lengths [ $\text{\AA}$ ] and-angles [ $^\circ$ ] for complex **1**

| Bond Lengths |            |             |            |
|--------------|------------|-------------|------------|
| Dy1-O2       | 2.272(3)   | Dy1-O3      | 2.526(3)   |
| Dy1-O4       | 2.317(3)   | Dy1-O5      | 2.497(3)   |
| Dy1-Cl6      | 2.665(1)   | Dy1-Cl7     | 2.621(1)   |
| Dy1 Cl8      | 2.639(1)   | N9-C15      | 1.306(5)   |
| O2-C4        | 1.302(5)   | O4-C22      | 1.305(5)   |
| O11-C8       | 1.395(5)   | O11-C40     | 1.396(5)   |
| O3-C68       | 1.389(5)   | O3-C49      | 1.425(5)   |
| O5-C36       | 1.390(5)   | O5-C65      | 1.435(5)   |
| N10-C13      | 1.421(5)   | N10-C25     | 1.300(5)   |
| N9-C2        | 1.427(5)   |             |            |
| Bond angles  |            |             |            |
| Cl7-Dy1-Cl8  | 87.52(4)   | Cl7-Dy1-Cl6 | 90.15(4)   |
| Cl8-Dy1-Cl6  | 159.31(4)  | O4-Dy1-O3   | 140.47(10) |
| O2-Dy1-Cl7   | 150.11(8)  | O4-Dy1-O5   | 64.87(10)  |
| O2-Dy1-Cl8   | 89.23(8)   | O4-Dy1-Cl6  | 115.40(8)  |
| O2-Dy1-O4    | 80.19(10)  | O3-Dy1-Cl7  | 84.72(7)   |
| O2-Dy1-O3    | 65.50(10)  | O3-Dy1-Cl8  | 79.05(7)   |
| O2-Dy1-O5    | 128.77(11) | O3-Dy1-Cl6  | 80.27(7)   |
| O2-Dy1-Cl6   | 82.61(8)   | O5-Dy1-Cl7  | 77.79(8)   |
| O4-Dy1-Cl7   | 128.51(8)  | O5-Dy1-Cl8  | 119.10(8)  |
| O4-Dy1-Cl8   | 81.58(8)   | O5-Dy1-O3   | 153.73(10) |
| O5-Dy1-Cl6   | 80.33(8)   |             |            |

**Table S2** Selected bond lengths [ $\text{\AA}$ ] and-angles [ $^\circ$ ] for complex **2**

| Bond Lengths |            |            |            |
|--------------|------------|------------|------------|
| Tb1-O2       | 2.288(2)   | Tb1-O3     | 2.555(3)   |
| Tb1-O4       | 2.316(2)   | Tb1-O5     | 2.517(3)   |
| Tb1-Cl6      | 2.6468(13) | Tb1-Cl7    | 2.6269(11) |
| Tb1-Cl8      | 2.6678(12) | O3-C1      | 1.378(5)   |
| O5-C24       | 1.444(5)   | O3-C28     | 1.424(5)   |
| O4-C22       | 1.300(4)   | O2-C6      | 1.302(4)   |
| N9-C7        | 1.304(5)   | O11-C9     | 1.385(5)   |
| N9-C8        | 1.421(5)   | O11-C14    | 1.388(5)   |
| N10-C15      | 1.424(5)   | O5-C23     | 1.377(5)   |
| N10-C20      | 1.301(5)   |            |            |
| Bond angles  |            |            |            |
| Cl6-Tb1-Cl8  | 160.38(4)  | O2-Tb1-O4  | 80.94(9)   |
| Cl7-Tb1-Cl8  | 90.57(4)   | O5-Tb1-Cl8 | 80.66(8)   |
| Cl7-Tb1-Cl6  | 88.00(5)   | O5-Tb1-Cl6 | 118.04(8)  |
| O3-Tb1-Cl8   | 80.73(7)   | O5-Tb1-Cl7 | 77.83(7)   |
| O3-Tb1-Cl6   | 79.65(7)   | O5-Tb1-O3  | 154.08(9)  |
| O3-Tb1-Cl7   | 84.48(7)   | O4-Tb1-Cl8 | 114.33(8)  |
| O2-Tb1-Cl8   | 82.60(8)   | O4-Tb1-Cl6 | 81.30(8)   |
| O2-Tb1-Cl6   | 88.64(8)   | O4-Tb1-Cl7 | 128.67(7)  |
| O2-Tb1-Cl7   | 149.15(7)  | O4-Tb1-O3  | 140.84(9)  |
| O2-Tb1-O3    | 64.75(9)   | O4-Tb1-O5  | 64.22(9)   |
| O2-Tb1-O5    | 129.91(10) |            |            |

**Table S3** Ln<sup>III</sup> ion geometry analysis by SHAPE software for two complexes.

| Complexes | $C_{2v}$ -CTPR | $C_{3v}$ -COC | $D_{5h}$ -JPBPY |
|-----------|----------------|---------------|-----------------|
| <b>1</b>  | 1.180          | 2.912         | 4.681           |
| <b>2</b>  | 1.304          | 3.124         | 4.410           |

**Table S4** Energy levels and eigenstates for **1** obtained from fitting the  $\chi_M T-T$  and  $M-H$  data.

| Energy / cm <sup>-1</sup> | Eigenstate                                                                              |
|---------------------------|-----------------------------------------------------------------------------------------|
| 0                         | 51.7%   $\pm 7/2$ > +15.0%   $\pm 5/2$ > +11.7%   $\pm 9/2$ >+5.5%   $\pm 11/2$ >+...   |
| 61                        | 43.2%   $\pm 5/2$ > +23.3%   $\pm 9/2$ > +16.9%   $\pm 7/2$ >9.1%   $\pm 3/2$ >+...     |
| 64                        | 85.9%   $\pm 13/2$ > +7.5%   $\pm 11/2$ > +4.7%   $\pm 3/2$ >+...                       |
| 84                        | 45.2%   $\pm 13/2$ > +18.5%   $\pm 1/2$ > +14.9%   $\pm 7/2$ > +8.9%   $\pm 9/2$ >+...  |
| 89                        | 45.5%   $\pm 9/2$ > +39.4%   $\pm 1/2$ > +1.4%   $\pm 13/2$ >+12.8%   $\pm 3/2$ > +...  |
| 141                       | 64.5%   $\pm 11/2$ > +11.1%   $\pm 3/2$ > +6.9%   $\pm 3/2$ > +...                      |
| 165                       | 30.2%   $\pm 1/2$ > +17.9%   $\pm 11/2$ > +17.4%   $\pm 3/2$ > +14.4%   $\pm 7/2$ >+... |
| 179                       | 96.3%   $\pm 13/2$ > +2.3%   $\pm 5/2$ > +...                                           |

**TableS5** Crystal field parameters from PHI program fitting for complex **1**.

|          | $B_0^2$ | $B_2^2$ | $B_0^4$ | $B_2^4$ | $B_4^4$ | $B_0^6$ | $B_2^6$ | $B_4^6$ | $B_6^6$ | Residual |
|----------|---------|---------|---------|---------|---------|---------|---------|---------|---------|----------|
| <b>1</b> | -36.47  | -181.43 | 11.39   | 11.93   | -43.15  | -38.92  | -138.38 | -153.40 | 100.17  | 0.033    |

**TableS6** Fitted parameters  $\alpha$  with Debye model under 2.0 K-6.0 K for complex **1**.

| Temperature/K | $\alpha_1$ | $\alpha_2$ |
|---------------|------------|------------|
| 2.0           | 0.50       | 0.80       |
| 2.4           | 0.45       | 0.79       |
| 2.8           | 0.41       | 0.77       |
| 3.2           | 0.35       | 0.76       |
| 3.6           | 0.29       | 0.74       |
| 4.0           | 0.25       | 0.72       |
| 4.4           | 0.23       | 0.71       |
| 4.8           | 0.23       | 0.70       |
| 5.2           | 0.22       | 0.69       |
| 5.6           | 0.11       | 0.68       |
| 6.0           | 0.02       | 0.68       |

**Table S7** Examples of seven-coordinate Dy<sup>III</sup> SIMs with low  $C_{nv}$  symmetry.

| Formula                                                              | Symmetry | $U_{eff}$      | Ref. |
|----------------------------------------------------------------------|----------|----------------|------|
| [(LOEt)Dy(( <i>R,R</i> )-Salphen)] <sub>2</sub> ·3H <sub>2</sub> O   | $C_{2v}$ | 24.6 K(2 KOe)  | 22a  |
| [DyH <sub>4</sub> L/ (SCN) <sub>2</sub> ](SCN) <sub>2</sub>          | $C_{2v}$ | 34.5 K(200 Oe) | 22b  |
| Dy(Hthd) <sub>3</sub> (MeOH)·2,5-Py                                  | $C_{2v}$ | 26.6 K(1 KOe)  | 14a  |
| Dy(( <i>R,R</i> )-5-Cl-Salcy)·CH <sub>3</sub> OH·1/8H <sub>2</sub> O | $C_{2v}$ | 13.2 K(2 KOe)  | 22a  |
| [(LOEt)Dy(TPP)]·0.25H <sub>2</sub> O                                 | $C_{3v}$ | 8.5 K(2 KOe)   | 22c  |
| [(LOEt)Dy(L)]·0.25H <sub>2</sub> O                                   | $C_{3v}$ | 41.6 K(2 KOe)  | 22d  |
| Dy(Hthd) <sub>3</sub> (Tppo)                                         | $C_{3v}$ | 35.9 K(1 KOe)  | 14a  |
| Dy(Hthd) <sub>3</sub> (PyNO)                                         | $C_{3v}$ | 42.7 K(1 KOe)  | 14a  |
| Dy(Hthd) <sub>3</sub> (4-PyNO)                                       | $C_{3v}$ | 55.8 K(1 KOe)  | 14a  |
